# Supplementary material
Source: publisher site journal article supplement (https://www.dovepress.com/article/306228)
Supplement: Supplementary file 1 [file get_supplementary_file.php]

**Supplementary Table 1. Recruited and Required Quotas**

| **Age group (N) / Task (%)** | **Total** | **TTO** | **SG** | **Required quota** |
| --- | --- | --- | --- | --- |
| 18-34 | 30.37 | 28.94 | 28.92 | 29.0 |
| 35-54 | 33.27 | 33.47 | 31.63 | 32.0 |
| 55+ | 36.36 | 37.59 | 39.46 | 39.0 |
| **Location** | | | | |
| Auvergne-Rhone-Alpes | 12.49 | 11.80 | 13.10 | 12.5 |
| Ile-de-France | 18.88 | 18.66 | 19.43 | 18.9 |
| Bourgogne-Franche-Comte | 4.30 | 4.66 | 4.22 | 4.3 |
| Bretagne | 5.49 | 5.62 | 6.33 | 5.5 |
| Centre-Val de Loire | 3.90 | 4.25 | 3.92 | 3.9 |
| Corse | 0.40 | 0.14 | 0.15 | 0.5 |
| Grand Est | 8.49 | 9.47 | 8.13 | 8.5 |
| Hauts-de-France | 9.19 | 9.60 | 7.68 | 9.2 |
| Normandie | 5.09 | 4.94 | 5.57 | 5.1 |
| Nouvelle-Aquitaine | 9.19 | 8.50 | 9.04 | 9.2 |
| Occitanie | 9.09 | 9.47 | 8.89 | 9.1 |
| Pays de la Loire | 5.89 | 4.39 | 5.72 | 5.9 |
| Provence-Alpes-Cote d'Azur | 7.39 | 8.23 | 7.53 | 7.9 |
| Missing | 0.20 | 0.27 | 0.30 |  |
| **Education** | | | | |
| Brevet des collegès | 27.37 | 28.12 | 27.56 | 31.0 |
| CAP, BEP ou Equivalent | 22.48 | 21.67 | 19.58 | 22.0 |
| Baccalauréat, brevet professionnel ou equivalent | 19.48 | 19.20 | 19.43 | 19.0 |
| Supérieur court (niveau bac + 2) | 11.49 | 10.97 | 11.60 | 11.0 |
| Supérieur long (supérieur bac + 2) | 18.48 | 19.34 | 21.08 | 18.0 |
| Missing | 0.70 | 0.69 | 0.75 |  |
| Total | 1001 | 729 | 664 |  |
